# Supplementary material for: Identification of novel drought-tolerant-associated SNPs in common bean (Phaseolus vulgaris)
Source: Front Plant Sci. 2015 Jul 21;6:546. doi: 10.3389/fpls.2015.00546 (PMC4508514; doi:10.3389/fpls.2015.00546)
Supplement: Supplementary file 4 [file Table4.XLSX]

## Sheet: SigSNP (4)
Supp. Table 2. SNP association to phenotypes. Each SNP is tested in different genetic models (codominat, dominant, recessive, overdominat and log-additive). The values represent the computed p-value for the model, highlighted in blue the lowest significant value per SNP.
			Genetic model
Trait	SNP		Codominant	Dominant	Recessive	Overdominant	LogAdditive
100SW	3		3.47718e-05	3.55924e-05		3.42161e-05
100SW	4		0.000206889	0.000172442		7.68856e-05
100SW	55		2.99525e-05	3.27362e-05		5.01448e-06
100SW	70			0.000332377
100SW	85			0.000591255
100SW	87		0.000280526	7.22638e-05
100SW	89		2.91809e-13	6.29926e-10	1.05481e-09						w
100SW	94		6.37773e+16	1.15573e-11	3857651000000000
100SW	99		8.12293e-06	1.05378e-05		2.79781e-06
100SW	100		0.000141656	9.45039e-05		5.86195e-05
100SW	109		0.000115846			0.000104474
100SW	112		0.000183856			0.000703598
100SW	113					0.000226386
100SW	114			0.000392218
100SW	133		5.57462e-07	7.3778e-07		2.70794e-07
100SW	142		5.84218e-05	2.77998e-05		4.39257e-05
100SW	148		4.8869e-06	1.67113e-06		7.00143e-05
100SW	165			0.000723346
100SW	167			0.000909703
DF	5		2.10448e-05
DF	6		6.54084e-06		1.40171e-06
DF	7		2.31524e-05
DF	9		0.000203997	8.99232e-05		0.000442106
DF	16		8.51584e-05
DF	17		4.82947e-05
DF	19		1.73631e-05		4.14728e-06
DF	24		2.06252e-05
DF	26		2.26332e-05
DF	27		2.55829e-05
DF	28		2.3915e-05
DF	29		2.39212e-05
DF	30		2.30067e-05
DF	31		2.31524e-05
DF	32		2.13862e-05
DF	33		9.48691e-05
DF	34		0.000391467		8.45982e-05
DF	35		2.26319e-06		7.14527e-05
DF	36		2.20003e-05
DF	38		0.000412959		9.02133e-05
DF	39		0.000117485
DF	40		3.36842e-06		7.27554e-05
DF	41		2.42841e-06		7.33499e-05
DF	43			0.000571879
DF	54					0.000653403
DF	56		2.41908e-05
DF	57		2.71887e-05
DF	59		2.44809e-05
DF	60		2.23194e-05
DF	61		2.38052e-05
DF	62		2.31524e-05
DF	63		2.07741e-05
DF	70			0.000253291
DF	74		1.16176e-05
DF	75		1.33749e-05
DF	77		2.21742e-05
DF	79		2.45747e-05
DF	80		2.51894e-05
DF	81		1.41761e-06	1.67616e-05	1.75878e-05
DF	85		2.31947e-05		5.65661e-06
DF	90		2.60366e-05
DF	91		2.53478e-05
DF	98		2.57278e-05
DF	104		0.000100723		1.7961e-05
DF	106		2.2806e-07		4.29255e-08	0.000150154
DF	107		7.75507e-05		1.35486e-05
DF	110		5.64709e-06	0.000880865	7.09964e-06
DF	112		8.2256e-06		0.000652572	0.000394039
DF	114		3.18191e-07		4.57398e-08
DF	115		2.31524e-05
DF	120		3.05187e-05
DF	122		1.51929e-06	4.51774e-05	2.03797e-05
DF	123		0.000108085		1.94371e-05
DF	128		7.10959e-06		4.3468e-06
DF	145		1.23513e-05
DF	148		1.9297e-06		3.00707e-07
DF	150		2.02153e-05	1.56849e-05
DF	155		8.97674e-06
DPM	9					0.000972313
DPM	70				0.000370006
DPM	89		3.16027e-05		3.25697e-05
DPM	94			0.000305315
DPM	118				0.000608805
DPM	133			0.00103037
DPM	142			0.000862061
DPM	155		3.65811e-05
HI	34		0.000178056			9.3808e-05
PB	14		0.000186633
PB	18		0.000230173
PB	25		0.000220304
PB	49		0.000217331
PB	76		0.000226874
PB	97		0.000226874
PB	136				0.000149094
PB	160		0.000508862		0.000148427
RI	5		0.000128893
RI	7		0.000121948
RI	14		0.000409593
RI	18		0.000400063
RI	24		0.000154925
RI	25		0.000406083
RI	26		0.000135395
RI	27		0.000113929
RI	28		0.000123296
RI	29		0.000127196
RI	30		0.000127826
RI	31		0.000121948
RI	32		0.000129797
RI	36		0.000133934
RI	49		0.000401526
RI	56		0.000124799
RI	57		0.000126313
RI	59		0.000111894
RI	60		0.000130221
RI	61		0.000123095
RI	62		0.000121948
RI	63		0.000115783
RI	69		0.00027138			9.82147e-05
RI	74		0.000154747
RI	75		0.000150705
RI	76		0.000384019
RI	77		0.00012291
RI	79		0.000125456
RI	80		0.000126534
RI	81		0.000258107		0.000135647
RI	90		0.000118711
RI	91		0.000125975
RI	97		0.000384019
RI	98		0.000123476
RI	115		0.000121948
RI	120		0.000117256
RI	145		0.000135549
RP	5		1.5054e-06
RP	6		0.000543197		0.000196452
RP	7		1.4104e-06
RP	17		2.40933e-05
RP	24		1.55611e-06
RP	26		1.50833e-06
RP	27		1.26272e-06
RP	28		1.45238e-06
RP	29		1.5537e-06
RP	30		1.36719e-06
RP	31		1.4104e-06
RP	32		1.60685e-06
RP	36		1.73903e-06
RP	56		1.47253e-06
RP	57		1.74916e-06
RP	59		1.58838e-06
RP	60		1.32036e-06
RP	61		1.45559e-06
RP	62		1.4104e-06
RP	63		1.41522e-06
RP	74		1.40386e-06
RP	75		1.38661e-06
RP	77		1.55141e-06
RP	79		1.46062e-06
RP	80		1.52832e-06
RP	81		4.75785e-07	4.89471e-05	1.51159e-06
RP	85		0.000493205		0.000121421
RP	90		1.39125e-06
RP	91		1.50096e-06
RP	98		1.48738e-06
RP	104		2.09954e-05		1.263e-05
RP	106		3.47084e-06		9.16873e-07	0.000236094
RP	107		1.10645e-05	6.40654e-05	0.000117435
RP	110				0.000331308
RP	115		1.4104e-06
RP	120		1.38097e-06
RP	122				0.00058721
RP	123		4.2743e-05		2.85382e-05
RP	128				0.000216097
RP	145		1.42077e-06
RP	148		0.000484295		9.33197e-05
RP	150		0.000228069	5.11098e-05
SB	5		2.77115e+22
SB	6		3.83482e-07	5.1617e-06	1.08423e-07
SB	7		3.37009e+22
SB	14		6.41282e+19
SB	18		8.84933e+19
SB	19		0.000177723		0.000136626
SB	21				0.0001195
SB	24		3.70836e+22
SB	25		8.70105e+19
SB	26		4.68545e+22
SB	27		2.61925e+22
SB	28		2.83864e+22
SB	29		3.72664e+22
SB	30		3.71212e+22
SB	31		3.37009e+22
SB	32		5.16981e+22
SB	34		1.3701e-05			0.000262589
SB	36		6.16382e+22
SB	49		8.05364e+19
SB	56		3.05924e+22
SB	57		5.46819e+22
SB	59		2.45609e+22
SB	60		2.49827e+22
SB	61		3.10632e+22
SB	62		3.37009e+22
SB	63		2.95101e+22
SB	69		0.000524648
SB	74		2.71659e+22
SB	75		3.96017e+22
SB	76		6.9359e+19
SB	77		3.06934e+22
SB	79		4.98156e+22
SB	80		4.75966e+22
SB	81		4.73833e+21	0.00103298	4.07035e+22
SB	89		0.000244539			4.64978e-05
SB	90		3.07202e+22
SB	91		2.73698e+22
SB	97		6.9359e+19
SB	98		2.63756e+22
SB	104					0.000610521
SB	115		3.37009e+22
SB	120		4.03647e+22
SB	136		0.000215608		5.40345e-05
SB	145		5.15102e+22
TB	5		1.06036e-12
TB	6				0.000579807
TB	7		1.1962e-12
TB	14		2.04453e-12
TB	18		3.10911e-12
TB	24		9.54634e-13
TB	25		3.02614e-12
TB	26		1.24155e-12
TB	27		1.25001e-12
TB	28		1.06783e-12
TB	29		1.18066e-12
TB	30		1.27148e-12
TB	31		1.1962e-12
TB	32		1.52133e-12
TB	36		1.41711e-12
TB	49		2.88272e-12
TB	56		1.07133e-12
TB	57		1.27483e-12
TB	59		1.09292e-12
TB	60		8.62481e-13
TB	61		1.10805e-12
TB	62		1.1962e-12
TB	63		1.2068e-12
TB	74		7.86239e-13
TB	75		9.99883e-13
TB	76		2.83459e-12
TB	77		1.09063e-12
TB	79		1.49859e-12
TB	80		1.46569e-12
TB	81		1.01372e-11		1.29434e-12
TB	89					0.0003887
TB	90		1.13383e-12
TB	91		9.94044e-13
TB	97		2.83459e-12
TB	98		9.3508e-13
TB	115		1.1962e-12
TB	120		1.30354e-12
TB	136		0.000100779		1.9363e-05
TB	145		1.44702e-12
TB	160				0.000415876
